## **Genetic differences between 129S substrains affect antiretroviral immune responses**

Robert Z. Zhang<sup>1</sup>, Vincent Mele<sup>1</sup>, Lia Robben<sup>1</sup>, Melissa Kane<sup>1,2,3\*</sup>

<sup>1</sup>Department of Pediatrics, Division of Infectious Diseases, University of Pittsburgh School of Medicine, Pittsburgh, PA 15224

<sup>2</sup>RK Mellon Institute for Pediatric Research, UPMC Children's Hospital of Pittsburgh, Pittsburgh, PA 15224

<sup>3</sup>Center for Microbial Pathogenesis, UPMC Children's Hospital of Pittsburgh, Pittsburgh PA

\*Address correspondence to Dr. M. Kane, Tel. (412-692-5493); e-mail: [kaneme@pitt.edu](mailto:kaneme@pitt.edu)

Running title: Antiretroviral immune responses in 129S mice

1    **Abstract**

2    Inbred mouse lines vary in their ability to mount protective antiretroviral immune responses, and  
3    even closely related strains can exhibit opposing phenotypes upon retroviral infection. Here, we  
4    found that 129S mice inherit a previously unknown mechanism for the production of anti-murine  
5    leukemia virus (MLV) antibodies and control of infection. The resistant phenotype is controlled  
6    by two dominant loci that are independent from known MLV-resistance genes. We also show  
7    that production of anti-MLV antibodies in 129S7, but not 129S1 mice is independent of  
8    interferon gamma (IFN $\gamma$ ) signaling. Thus, our data indicate that 129S mice inherit an unknown  
9    mechanism for control of MLV infection and demonstrate that there is genetic variability in 129S  
10   substrains that affects their ability to mount antiviral immune responses.

11

12   **Importance**

13   Understanding the genetic basis for production of protective antiviral immune responses is  
14   crucial for the development of novel vaccines and adjuvants. Additionally, characterizing the  
15   genetic and phenotypic variability in inbred mice has implications for the selection of strains for  
16   targeted mutagenesis, choice of controls, and for broader understanding of the requirements for  
17   protective immunity.

## 18 **Introduction**

19 Resistance and sensitivity to viral infections depends greatly upon the genetic make-up of the  
20 host. Model organisms such as inbred mice have proved to be invaluable for the investigation of  
21 the pathways underlying protective immune responses due to the inability to perform genetic  
22 manipulations in humans. In this regard, mouse models of murine retroviruses, such as murine  
23 leukemia virus (MLV) and mouse mammary tumor virus (MMTV) have provided essential  
24 insights into the molecular mechanisms underlying anti-viral immune responses. MLV is  
25 transmitted as an exogenous virus through the blood and milk or as an endogenous stably  
26 integrated provirus and primarily infects cells of lymphoid origin (1). Pathogenic MLVs are often  
27 a mixture of ecotropic and polytropic [mink cell focus forming (MCF)] viruses, and some contain  
28 an additional replication-defective spleen focus forming virus (SFFV) component that promotes  
29 pathogenesis (1). These viruses cause a range of diseases in susceptible mice, including  
30 lymphomas, leukemias, rhabdomyosarcoma, neurological disorders, and immunosuppression  
31 (2-6). Mice from retrovirus-susceptible strains, such as BALB/c mice, sense retroviral  
32 pathogens, as indicated by the fact that they initiate an antiretroviral response. However, this  
33 response is not long-lasting and is unsuccessful in controlling virus replication (7, 8), which is  
34 most likely due to the numerous mechanisms of immune evasion employed by retroviruses (9-  
35 13). In contrast, pathogen detection in resistant mice translates into a robust, long-lasting, and  
36 virus-neutralizing immune response comprised of both T and B cells responses (7, 9, 14, 15).

37 Classical genetics approaches in mice have identified several genes that play a role in  
38 directly restricting MLV replication, or in the generation of protective antiviral immune responses  
39 [Table 1 and recently reviewed in (16)]. *Fv1* is a capsid-specific restriction factor encoded by an  
40 endogenous retroviral *Gag* gene that governs tropism of MLV. Alleles of *Fv1* are defined by their  
41 ability to block specific subclasses of MLV, with incompatibility resulting in a post-entry block to  
42 infection, (17-20) and in some cases, stimulation of cross-protective neutralizing adaptive  
43 immune responses (21). *Fv2* is a dominant Friend MLV (FV) susceptibility gene that facilitates  
44 splenomegaly and erythroleukemia induction by SFFV by promoting erythropoietin receptor

45 signaling (22, 23). *Rfv3* is a dominant FV resistance gene that is encoded by *Apobec3*. The  
46 resistant allele of *Apobec3* inherited by C57BL/6 and C57BL/10 mice restricts FV replication and  
47 promotes neutralizing antibody (Ab) responses (24). *Vic1* is a recessive MLV and MMTV  
48 resistance gene that is encoded by *H2-Ob*, the beta subunit (O $\beta$  in mice and DO $\beta$  in humans) of  
49 the nonclassical major histocompatibility complex class II (MHC-II)-like molecule H2-O (HLA-DO  
50 or DO in humans) (25). The resistant, functionally null allele of *vic1* inherited by I/LnJ mice  
51 results in sustained production of virus-neutralizing Abs. Transfer of the I/LnJ *vic1* locus to  
52 multiple retrovirus susceptible backgrounds, which contain a functional allele of *Ob*, such as  
53 BALB/cJ (BALB/c<sup>*vic1*/LnJ</sup> congenic mice) confers the ability to produce neutralizing Abs against  
54 both MMTV and MLV (25, 26). Finally, adaptive immune responses against retroviruses in mice  
55 (and humans) are also affected by classical MHC class I and II genes, with specific haplotypes  
56 directing virus-specific cytotoxic T cell and Ab responses (16, 22).

57 Ab responses to soluble protein and carbohydrate antigens in mice are generally  
58 restricted to the IgG1 and IgG3 isotypes (27, 28), while infection of mice with a variety of viral  
59 and parasitic pathogens results in a unique bias in class switching to IgG2a (or IgG2c) Abs (29-  
60 31), including antiretroviral Ab responses in I/LnJ mice (7). In mice, the Th1-type cytokine  
61 interferon gamma (IFN $\gamma$ ) has been well established as the canonical signal for class switching to  
62 the IgG2a/c isotype both in vitro and in the context of infection (32). Specifically, in B6 mice,  
63 IFN $\gamma$  is required for Ab responses to MLV infection and for long-term viral control (33), and in  
64 I/LnJ mice, IFN $\gamma$  is essential to produce antibodies of any isotype against retroviral infections (7,  
65 26). However, we recently reported that in BALB/cJ<sup>*vic1*/i</sup> mice, IFN $\gamma$  is dispensable for the  
66 production of anti-MLV IgG2a Abs (34), indicating that BALB/cJ mice inherit an alternative  
67 mechanism for stimulating antiviral IgG2a Ab production upon viral infection. The ability to  
68 generate IFN $\gamma$ -independent Ab responses in BALB/cJ mice is controlled by a single recessive  
69 locus on Chromosome (Chr) 9, which we have named *interferon-gamma independent IgG2a*  
70 (*igii*) (34).

71 Reverse genetics approaches in mice are a powerful tool to understand the function of  
72 specific genes and have provided essential research models for numerous diseases. Prior to  
73 the development of CRISPR technology, which allowed for targeted mutagenesis on multiple  
74 genetic backgrounds, most ES cell lines used for targeted mutagenesis came from substrains of  
75 129 mice. The 129 lineage has a complex history, with multiple outcrossing and bottleneck  
76 events, resulting in three major lineages (Parental, Steel, and *Ter*), with substantial substrain  
77 variability ((35, 36) and Figure S1). This complex history has important implications for  
78 investigations using 129 mice, and on analysis of targeted mutations that have been crossed to  
79 other genetic backgrounds. Here, we investigated anti-MLV immune responses in 129S  
80 substrains and determined that 129S1 mice inherit two loci that control antiviral immunity. We  
81 also demonstrate that genetic differences between 129S substrains affect IFN $\gamma$ -independent  
82 antiviral immune responses.

83

## 84 **Results**

### 85 **A dominant genetic mechanism controls anti-MLV immune responses in 129S1 mice.**

86 Previous reports demonstrated that 129P2 mice (representative of the Parental 129 substrains)  
87 inherit the *Fv1<sup>nr</sup>* allele, which restricts B-tropic and some N-tropic, but not NB-tropic strains of  
88 MLV (21, 37, 38). 129P2 infected with a B-tropic FV produce robust cross-protective neutralizing  
89 Ab responses due to this *Fv1*-incompatibility. However, although they produce FV-specific Abs  
90 upon infection with an NB-tropic FV, since they inherit susceptible alleles of *Fv2* and *Rfv3*, they  
91 do not control the infection (21, 39). These reports additionally suggest that the entire 129  
92 lineage is *Fv1<sup>nr/nr</sup>* and *Fv2<sup>s/s</sup>* (21, 23, 37, 38). Furthermore, genotyping of two Steel substrains  
93 (see Materials and Methods) at the *Rfv3* locus indicates that the 129 lineage is *Rfv3<sup>s/s</sup>*. To  
94 investigate antiviral responses in 129 Steel substrains, we infected 129S1/SvImJ (129S1;  
95 developed as a control for steel-derived ES cells (40)) mice with Rauscher-like-MLV (RL-MLV)  
96 and monitored them for antiviral Ab production, development of splenomegaly, and viral titers in  
97 the spleen. RL-MLV is a mixture of a NB-tropic ecotropic virus and a polytropic MCF virus that

98 causes erythroid leukemias; the mixture does not contain an SFFV component (3), therefore the  
99 *Fv2* allele does not affect disease outcome. While susceptible control BALB/cByJ (ByJ) mice do  
100 not produce a robust Ab response and were unable to control infection, 129S1 mice produced a  
101 robust IgG2a Ab response against RL-MLV and the majority (83%) cleared infection and did not  
102 develop splenomegaly (Figures 1 and S2). To determine whether the ability to produce  
103 protective anti-MLV Ab responses is inherited in a dominant or recessive fashion, we crossed  
104 129S1 mice to BALB/cByJ mice (Figure 2A). F<sub>1</sub> mice generated from these crosses were  
105 infected with RL-MLV and screened for antiviral Abs. F<sub>1</sub> mice from crosses of both directions  
106 [(129S1xByJ) and (ByJx129S1)] produced antiviral Abs, although IgG2a productions was slightly  
107 lower in (ByJx129S1) F<sub>1</sub> animals (Figure 1A). Additionally, the majority of F<sub>1</sub> mice eliminated the  
108 virus and did not develop splenomegaly (Figure 1B-C), indicating that resistance to RL-MLV is  
109 inherited in a dominant fashion.

110

111 **Two loci control anti-MLV Ab responses in 129S1 mice.** We next investigated how many loci  
112 control anti-MLV Ab production by crossing resistant (129S1xByJ) F<sub>1</sub> mice to susceptible ByJ  
113 mice to generate N<sub>2</sub> mice (Figure 2A). We found that 9 out of 40 (23%) N<sub>2</sub> mice produced  
114 antiviral IgG2a Abs (Figure 2B). We then determined the viral titers in the spleen and spleen  
115 weights of Ab negative and Ab positive N<sub>2</sub> mice and found that the Ab positive (resistant), but  
116 not the Ab negative (susceptible) N<sub>2</sub> mice cleared the infection and had normal spleen weights  
117 (Figure 2B). This three:one ratio of susceptible to resistant N<sub>2</sub> animals indicates that two loci  
118 control the production of protective anti-RL-MLV Ab responses in 129S1 mice. Since the major  
119 histocompatibility complex (MHC) locus is a major factor in controlling antiviral immunity,  
120 including anti-MLV responses (16, 22), and 129S1 mice inherit the protective H2<sup>b</sup> haplotype  
121 while ByJ mice inherit the susceptible H2<sup>d</sup> haplotype (Table 1), we next investigated whether the  
122 MHC locus is one of the genetic determinants for anti-MLV Ab responses in 129S1 mice. MHC  
123 haplotypes of N<sub>2</sub> mice were determined by staining peripheral blood lymphocytes with  
124 haplotype-specific Abs for MHC Class I (H2-D<sup>b</sup>, H2-D<sup>d</sup>) and Class II (I-A<sup>b</sup>, I-A<sup>d</sup>). We did not

125 observe significant differences in Ab production, viral titers, and spleen weights in RL-MLV  
126 infected H2<sup>b/d</sup> and H2<sup>d/d</sup> N<sub>2</sub> mice (Figure 2C-D and Table S1), indicating that control of infection  
127 in N<sub>2</sub> mice is not determined by inheritance of the resistant H2<sup>b</sup> haplotype and that non-MHC  
128 loci control antiviral responses in 129S1 mice.

129

130 **IFN $\gamma$ -signaling is dispensable for anti-MLV IgG2a-specific Ab production in 129S7 mice.**

131 Following our previous finding that BALB/cJ mice congenic for the resistant allele of *vic1*  
132 produce antiviral IgG2a Abs in the absence of IFN $\gamma$  (34), we wondered whether this pathway  
133 was unique to this genetic background. Earlier reports indicated that 129S mice also inherit a  
134 pathway for IFN $\gamma$ -independent production, as IFN $\gamma$ -receptor 1 (IFN $\gamma$ R)-deficient 129S7 (G129)  
135 mice produce IgG2a Abs against lymphocytic choriomeningitis virus (LCMV) (41) and (lactate  
136 dehydrogenase-elevating virus) LV (42). We therefore investigated whether IFN $\gamma$ R<sup>-/-</sup> 129S7  
137 mice produce IFN $\gamma$ -independent IgG2a Abs against RL-MLV. Control IFN $\gamma$ R<sup>-/-</sup> ByJ (which do not  
138 inherit the resistant *vic1* allele, Table 1) mice did not produce Abs of any isotype and did not  
139 control infection, while IFN $\gamma$ R<sup>-/-</sup> 129S7 mice produced IgG2a Abs against RL-MLV (Figure 3A  
140 and Figure S2). Although Ab production was lower than in IFN $\gamma$ R-sufficient 129S1 mice, the  
141 majority of IFN $\gamma$ R<sup>-/-</sup> 129S7 mice (60%) cleared infection and did not develop splenomegaly  
142 (Figure 3 and Table 1). Therefore, like BALB/cJ mice, 129S7 mice inherit a mechanism for  
143 noncanonical, IFN $\gamma$ -independent antiretroviral Ab production.

144

145 **IFN $\gamma$ -independent anti-MLV IgG2a production in 129S7 mice is a complex trait.** We next  
146 sought to investigate whether IFN $\gamma$ -independent antiretroviral Ab production in 129S7 mice and  
147 BALB/cJ mice is controlled by the same genetic mechanism. Since the resistant allele of *igii*-  
148 inherited by BALB/cJ mice is recessive, we reasoned that IFN $\gamma$ R<sup>-/-</sup> F<sub>1</sub> animals inheriting the  
149 129S7 and BALB/c allele would only produce antiviral IgG2a Abs if the 129S7 allele of *igii* is  
150 resistant. IFN $\gamma$ R-deficient mice are available on the BALB/cByJ background, and we crossed  
151 these mice to IFN $\gamma$ R<sup>-/-</sup> 129S7 mice. F<sub>1</sub> mice generated from these crosses were infected with

152 RL-MLV and screened for antiviral Abs. These F<sub>1</sub> progeny did not display a clear phenotype,  
153 with ~30% of mice producing Abs and controlling infection while the majority did not produce  
154 Abs, developed splenomegaly, and had infectious virus in their spleens (Figure 4 and Table S1).  
155 Therefore, the phenotype is not fully penetrant, and the genetic basis for IFN $\gamma$ -independent  
156 antiretroviral Ab production in 129S7 mice cannot be determined from these crosses.  
157 Furthermore, although these experiments suggest that 129S7 mice do not inherit a resistant  
158 allele of *igii*, BALB/cByJ and BALB/cJ mice have been separated since 1935, and *vic1*  
159 congenics are not available on the ByJ background, therefore we cannot exclude the possibility  
160 that ByJ and BALB/cJ mice inherit different alleles of *igii*.

161

162 **Anti-MLV Ab production in 129S1 mice is IFN $\gamma$ -dependent.** Since we were unable to  
163 determine the genetic basis for IFN $\gamma$ -independent antiretroviral Ab production in 129S7 mice by  
164 crossing to IFN $\gamma$ R<sup>-/-</sup> ByJ mice, and these strains are deficient for the IFN $\gamma$  receptor rather than  
165 the cytokine, we decided to generate IFN $\gamma$ -deficient 129S mice for the investigation of IFN $\gamma$ -  
166 independent Ab responses. Considering that wild-type mice of the precise genetic background  
167 of 129S7-*Ifngr*<sup>-/-</sup> no longer exist, we selected the 129S1 background for the knock-out of IFN $\gamma$ ,  
168 as they are the control strain recommended by the Jackson Laboratory for lines derived from  
169 multiple 129S substrains. We used a previously validated CRISPR/Cas9 approach that targeted  
170 introns 1 and 3 of the *Ifng* gene, thereby deleting exons 2 and 3, removing four of six alpha  
171 helices ((43) and Figure S3A). We infected heterozygous control and IFN $\gamma$ <sup>-/-</sup> mice from two  
172 founder lines with RL-MLV and monitored them for antiviral Ab production. Although IFN $\gamma$   
173 sufficient controls produced antiviral IgG2a Abs and cleared the infection, IFN $\gamma$ <sup>-/-</sup> 129S1 mice  
174 from either founder line failed to produce a robust antiviral Ab response of any isotype (Figure  
175 5). Additionally, less than 20% of IFN $\gamma$ <sup>-/-</sup> 129S1 mice cleared the infection, and the majority  
176 developed splenomegaly (Figure 5B-C and Table S1), indicating that unlike 129S7 mice, 129S1  
177 mice do not inherit a pathway for directing IFN $\gamma$ -independent antiretroviral Ab responses.

178



179 **Genetic differences, not alternative receptor usage, underlie differential requirements for**  
180 **IFN $\gamma$ -signaling in 129S mice.** To determine if antiviral IgG2a Ab responses in 129S7 mice are  
181 the result of IFN $\gamma$  signaling through an alternative receptor or result from genetic differences  
182 between 129S7 and 129S1 mice, we crossed IFN $\gamma$ R<sup>-/-</sup> 129S7 mice to IFN $\gamma$ <sup>-/-</sup> 129S1 mice and  
183 then intercrossed the resulting F<sub>1</sub> generation (Figure 6A). If IFN $\gamma$  signaling through an  
184 alternative receptor explained virus resistance in IFN $\gamma$ R<sup>-/-</sup> 129S7 mice, we would expect to  
185 observe antiviral Ab production in IFN $\gamma$ R<sup>-/-</sup>, but not IFN $\gamma$ <sup>-/-</sup>, or IFN $\gamma$ /IFN $\gamma$ R<sup>-/-</sup> F<sub>2</sub> mice. On the other  
186 hand, if 129S7 inherit an alternative pathway for IFN $\gamma$ -independent antiviral Ab production, we  
187 would expect a mixture of resistant and susceptible F<sub>2</sub> mice independently of inheritance of  
188 IFN $\gamma$ R- or IFN $\gamma$ -deficiency. As expected, F<sub>2</sub> mice sufficient for both cytokine and receptor  
189 produced anti-MLV IgG2a-specific Abs and cleared the infection (Fig 6B-C). However, antiviral  
190 Ab production was not observed in the majority of IFN $\gamma$ R<sup>-/-</sup> F<sub>2</sub> mice, and only 10% cleared the  
191 infection (Figure 6B-C). Interestingly, more IFN $\gamma$ <sup>-/-</sup> and IFN $\gamma$ /IFN $\gamma$ R<sup>-/-</sup> F<sub>2</sub> mice produced anti-MLV  
192 Abs and cleared infection than IFN $\gamma$ R<sup>-/-</sup> F<sub>2</sub> mice, and 64% of IFN $\gamma$ <sup>-/-</sup> and 100% of IFN $\gamma$ /IFN $\gamma$ R<sup>-/-</sup> F<sub>2</sub>  
193 mice cleared the infection (although only four double-deficient mice were infected) (Figure 6B-D  
194 and Table S1). These data strongly suggest that IFN $\gamma$  does not signal through an alternative  
195 receptor to stimulate antiviral Abs in 129S7 mice and that an unknown genetic factor(s) present  
196 in 129S7, but not 129S1 mice controls IFN $\gamma$ -independent antiretroviral Ab responses.

197

## 198 **Discussion**

199 Here, we demonstrate that 129S1 mice inherit a previously unknown mechanism that controls  
200 the production of protective antiviral Ab production upon MLV infection. This phenotype is  
201 inherited in a dominant fashion and is controlled by two loci (Figures 1-2). Importantly, these loci  
202 are distinct from previously characterized genes that restrict retroviral replication (*Fv1*, *Fv2*,  
203 *Rfv3*) or promote antiviral immune responses (*vic1*, MHC locus, *Rfv3*), indicating that the  
204 pathway in 129S1 mice potentially encodes for a novel mechanism for the stimulation of  
205 protective immunity. Unlike I/LnJ and C57BL/6 mice, which fully clear RL-MLV infection (15, 26),

206 MLV resistance in 129S1 mice is not fully penetrant, as ~15% of infected mice fail to produce  
207 antiviral Abs, develop splenomegaly, and retain infectious virus in their spleens (Figures 1 and  
208 5, Table S1). Additionally, although this mechanism does not appear to be sex-linked, there was  
209 a reduction in IgG2a Ab production in (ByJx129S1) F<sub>1</sub> mice, and fewer of them cleared the  
210 infection than 129S1 or (129S1xByJ) F<sub>1</sub> mice (Figure 1 and Table S1), indicating that epigenetic  
211 or environmental factors may play a role in controlling anti-MLV responses in 129S1 mice.

212 IFN $\gamma$  is a well-established signal for stimulating CSR to the IgG2a isotype both *in vitro*  
213 and in the context of various viral infections (21, 37, 38), including FV infection in B6 mice (22)  
214 and RL-MLV and MMTV infection in I/LnJ mice (6, 15). We previously demonstrated that  
215 BALB/cJ mice inherit a pathway for the generation of IFN $\gamma$ -independent IgG2a antiviral Ab  
216 responses that is controlled by a single recessive locus, *igii*, which is mapped to Chr. 9 (34).  
217 Here, we demonstrate that 129S7 mice also inherit a pathway for IFN $\gamma$ -independent anti-MLV  
218 Ab production. However, the mechanism for IFN $\gamma$ R-independent anti-RL-MLV responses in  
219 129S7 mice is a complex genetic trait, and we were unable to determine whether the pathway is  
220 controlled by *igii* or another locus (or multiple loci). Nevertheless, the ability of both BALB/cJ and  
221 129S7 mice to produce IFN $\gamma$ -independent Abs against a variety of infections including  
222 retroviruses, herpes simplex virus (HSV), LCMV, LV, and parasitic infections (34, 41, 42),  
223 indicates that alternative pathways in addition to the canonical IFN $\gamma$ -dependent pathway can  
224 stimulate neutralizing Ab responses. Since production of IFN $\gamma$ -independent Ab responses in  
225 BALB/cJ mice is independent of *vic1* for HSV and VSV infections (but not MLV infections), this  
226 indicates that the ability to produce anti-viral Ab responses and the ability to produce these  
227 responses in the absence of IFN $\gamma$  signaling are controlled by distinct genetic mechanisms.  
228 Although we anticipate this is also the case for 129S7 mice, it cannot be definitively  
229 demonstrated. These findings additionally highlight the importance of utilizing mice of multiple  
230 genetic backgrounds to investigate the requirements for stimulating protective antiviral  
231 immunity.

232           Following decades of widespread use of 129 ES cell lines, two reports from 1997  
233 investigated the variation between 129 substrains and found substantial genetic variation  
234 resulting from genetic drift, genetic contamination, and residual heterozygosity from  
235 backcrossing programs (35, 36). This initiated efforts to clarify the nomenclature for the  
236 improvement of gene targeting experiments and the selection and consideration of controls for  
237 comparing phenotypes of genes targeted in ES cells of different 129 substrains (35, 36, 44).  
238 These findings further suggested important features that should be considered for targeted  
239 mutagenesis using 129 substrains 1) chimeras produced using 129 ES cells should be crossed  
240 to a genetically matched substrain for maintenance on the 129 background and 2) selection of a  
241 129 substrain for targeted mutagenesis should involve consideration of different genetic traits  
242 between substrains (35). Like many mice generated prior to these recommendations, chimeric  
243 IFN $\gamma$ R<sup>-/-</sup> 129S mice were not crossed to a genetically matched substrain, and the appropriate  
244 wild-type control strain is unavailable. The 129S1 substrain is therefore recommended as the  
245 control inbred strain for steel substrain-derived ES cell lines (40). However, we found that while  
246 129S7 mice produce antiviral Ab responses in the absence of IFN $\gamma$ , this mechanism is not  
247 inherited by 129S1 mice (Figure 5). Some reports have suggested that IFN $\gamma$  can signal through  
248 an alternative receptor in the absence of *Ifngr1* (45-47), but this does not explain the differences  
249 between 129S1 and 129S7 substrains reported here, as IFN $\gamma$ R<sup>-/-</sup> (129S1x129S7) F<sub>2</sub> mice did not  
250 produce antiviral Abs (Figure 6). Therefore, for the purposes of investigating the requirements  
251 for IFN $\gamma$  in antiviral defenses, 129S1 mice are not an appropriate control for 129S7-*Ifngr*<sup>-/-</sup> mice.  
252 The higher incidence of IFN $\gamma$ -independent Ab production in IFN $\gamma$ <sup>-/-</sup> and IFN $\gamma$ /IFN $\gamma$ R<sup>-/-</sup> F<sub>2</sub> mice  
253 than IFN $\gamma$ R<sup>-/-</sup> F<sub>2</sub> mice (Figure 6) was intriguing. However, while the number of F<sub>2</sub> animals  
254 phenotyped here is sufficient to eliminate alternative receptor usage by IFN $\gamma$  as the basis for  
255 IFN $\gamma$ R-independent Ab production, retroviral resistance is not a fully penetrant phenotype in  
256 either 129S1 or 129S7-*Ifngr*<sup>-/-</sup> mice, and it appears that IFN $\gamma$ -independent antiviral Ab  
257 production in 129S7 mice is a complex trait. Therefore, larger numbers of F<sub>2</sub> mice would be

258 required to draw any other conclusions regarding the genetic basis for these substrain  
259 differences.

260 While 129 substrains have the same genotypes at known MLV-resistance loci [(21, 23,  
261 37, 38) and this report], our findings clearly indicate that there are unappreciated differences in  
262 their ability to mount protective antiviral immune responses. As such, it is unknown whether the  
263 129P2/OlaHsd substrain utilized in many investigations on immune responses to FV infection  
264 would exhibit a similar phenotype to 129S1 mice when infected with RL-MLV, or whether they  
265 can produce IFN $\gamma$ -independent antiviral immune responses. In fact, these substrains have been  
266 separated since the re-establishment of the 129 line in 1948 following the fire at Jackson Labs  
267 and have substantial genetic variation between them ((35, 36, 48) and Figure S1). The different  
268 phenotypes observed here between Steel substrains are not entirely surprising since the 129S1  
269 lineage has been separated from the 129/SvEv lineage, from which the IFN $\gamma$ R<sup>-/-</sup> 129S7 mice are  
270 derived, since 1969. Furthermore, additional crosses occurred in the 129/SvEv lineage prior to  
271 the introduction of the *Ifngr1* mutation in 129S7-derived AB1 ES cells [Figure S1 and (35, 48)],  
272 thereby increasing the genetic divergence of these substrains. Ideally, we would conduct  
273 experiments to confirm whether 129S7 and 129S1 mice inherit the same genetic mechanism  
274 controlling the production of anti-MLV Abs and differ only their ability to produce these  
275 responses in the absence of IFN $\gamma$ . Unfortunately, such experiments cannot be conducted  
276 because wild-type 129S7 mice no longer exist. Collectively, our findings further emphasize the  
277 need for careful consideration of the genetic background of mutant and control mice and  
278 indicate that genetic differences between 129S substrains can have consequences well beyond  
279 affecting the efficiency of traditional gene targeting methods.

280

## 281 **Acknowledgements**

282 We thank Dr. Tatyana Golovkina for support and consultation; S. Gingras and the transgenic  
283 and gene targeting (TGT) core for the generation of *Ifng*<sup>-/-</sup> mice; Leigh Miller and Dr. John Alcorn  
284 for reagents and technical assistance for intracellular IFN $\gamma$  staining; and members of the Kane,

285 Golovkina, and Dr. Alexander Chervonsky laboratories for helpful discussion. This work was  
286 supported by a Pilot Award from the RK Mellon Institute for Pediatric Research (to M.K.). R.Z. is  
287 supported by T32 AI049820. The content is solely the responsibility of the authors.

288

289 **Author contributions**

290 Conception and design: M.K.; Acquisition of data: R.Z.Z., V.M., L.R., and M.K.; Analysis and  
291 interpretation of data: R.Z.Z. and M.K.; Drafting the article: M.K.; Revising the article: M.K.,  
292 R.Z.Z., and V.M..

293

294 **Declaration of interests**

295 The authors declare no competing interests

296

297

298

## 299 **Materials and Methods**

### 300 **Mice**

301 129S1/SvImJ (129S1 stock #002448) and BALB/cByJ (stock #001026) were purchased from  
302 the Jackson Laboratory. 129-*Ifngr*<sup>tm1Agt/J</sup> [(48) also known as G129] mice were purchased from  
303 the Jackson Laboratory (via cryo recovery, stock #002702) and bred and maintained at the  
304 University of Pittsburgh. IFN $\gamma$ R<sup>-/-</sup> 129 mice were generated using AB1 ES cells derived from  
305 129S7/SvEvBrd-*Hprt*<sup>b-m2</sup> (129S7) mice, and chimeric founder males were crossed to an  
306 unknown 129/SvEv substrain (although 129S8 mice are commonly referred to as 129/SvEv and  
307 may have been used for these crosses) (48) for simplicity, we refer to these as 129S7-*Ifngr*<sup>-/-</sup>  
308 mice (Figure S1). C.129S7(B6)-*Ifngr*<sup>tm1Agt/J</sup> (IFN $\gamma$ R<sup>-/-</sup> ByJ) were purchased from the Jackson  
309 Laboratory (via cryo recovery, stock #002286) and bred and maintained at the University of  
310 Pittsburgh. Mice of both sexes were used in equal ratios for all experiments.

311  
312 *Ifng*-deficient 129S1 mice were generated using CRISPR/Cas9 technology. The target  
313 sequences (5' guide sequence: 5'-GCTGTTTCCCTGCGTAGTTT-3'; 3' guide sequence: 5'-  
314 TAGAGGCTAACCAGAGCCGA-3') were previously validated for the generation of conditional  
315 knockout strains on the C57BL/6 background (43). Two male founders with complete deletions  
316 of exons 2 and 3 (removing sequences coding for amino acids 38-120) were selected (Figure  
317 S3A) and crossed to 129S1 females. Potential off-target sites with fewer than three mismatches  
318 identified by the Cas-OFFinder algorithm (49) were sequenced in N<sub>1</sub> and N<sub>2</sub> mice, and mice with  
319 no mutations at these sites were intercrossed to produce homozygous *Ifng*-deficient mice. Both  
320 founder lines express a truncated IFN $\gamma$  protein [lacking four of six alpha helices (50)] that is not  
321 biologically active (Figure S3B-C).

322

323 Mice were genotyped from tail biopsies using real time PCR with specific probes designed for  
324 each gene (Transnetyx, Cordova, TN) or by flow cytometry (see below). Mice of both sexes  
325 were used in equal numbers for each experiment. All animal experiments were performed in the

326 American Association for the Accreditation of Laboratory Animal Care-accredited, specific-  
327 pathogen-free facility Division of Laboratory Animal Resources, University of Pittsburgh School  
328 of Medicine. Animal protocols were reviewed and approved by the Institutional Animal Care and  
329 Use Committee at The University of Pittsburgh.

330

### 331 **Flow cytometry**

332 For MHC genotyping of [(129S1xByJ)xByJ]N<sub>2</sub> mice, blood was collected in sodium heparin  
333 collection vials (SAI Infusion Technologies), and peripheral blood lymphocytes were isolated by  
334 overlaying with Ficoll-Paque (Cytivia) and spinning at 11,000xg for 4min at 25°C. Lymphocytes  
335 were stained with antibodies against Class I [brilliant blue 700 (BB700)-conjugated anti-H-2Db  
336 (BD Biosciences) and phycoerythrin (PE)-conjugated anti-H-2Dd (BD Biosciences)] or Class II  
337 [peridinin chlorophyll (PerCP)-eFluor 710-conjugated anti-H2-Ab1 (I-Ab, Invitrogen) and PE-  
338 conjugated anti-H2-Ad1 (I-Ad, BD Biosciences)] MHC and analyzed on an Attune NxT  
339 cytometer (Life Technologies).

340

### 341 **MLV infection**

342 Rauscher-like MuLV (RL-MuLV), a mixture consisting of NB-tropic ecotropic and mink lung cell  
343 focus-forming viruses, was described previously (69) and was provided by T. Golovkina,  
344 University of Chicago. The virus was propagated in SC-1 embryonic mouse fibroblasts (ATCC).  
345 Ecotropic (Eco) viral titers were determined by an infectious center assay (70). Experimental  
346 mice were injected i.p. with  $2 \times 10^4$  Eco PFUs at 5-8 weeks of age and screened for anti-virus  
347 antibodies and plaque forming units 8-10 weeks later.

348

### 349 **ELISA**

350 To detect MuLV Abs in mouse sera, an enzyme-linked immunosorbent assay (ELISA) was  
351 performed as previously described (6, 15). Virions isolated from RL-MLV infected SC-1 cells  
352 were treated with 0.1% Triton X-100 and bound to plastic in borate-buffered saline overnight,

353 followed by incubation with mouse serum samples at 4°C for 90 minutes. All sera were used at  
354  $2 \times 10^{-2}$  dilutions. Mouse IgG2a-specific, as well as total IgG-specific secondary antibodies  
355 coupled to horseradish peroxidase (HRP) (Jackson ImmunoResearch) were used to detect anti-  
356 virus antibodies. Ovalbumin (2%) was used as a blocking reagent. Backgrounds obtained from  
357 incubation with secondary antibodies alone were subtracted from the values obtained from sera  
358 of infected mice.

359

### 360 **Statistical analyses**

361 Statistical significance was determined using GraphPad software (one way ANOVA or unpaired  
362 t test).

363

364

365



366 **References**

367

- 368 1. Rosenberg N, Jolicoeur P. 1997. Retroviral Pathogenesis, p 475-586. *In* Coffin JM,  
369 Hughes SH, Varmus HE (ed), *Retroviruses*. Cold Spring Harbor Laboratory Press, Cold  
370 Spring Harbor, NY.
- 371 2. Teich N, Wyke J, Bernstein A, Hardy W. 1982. Pathogenesis of retrovirus-induced  
372 disease., p 785-988. *In* Weiss R, Teich N, Varmus HE, Coffin JM (ed), *RNA Tumor*  
373 *Viruses*. Cold Spring Harbor Laboratory.
- 374 3. Hook LM, Jude BA, Ter-Grigorov VS, Hartley JW, Morse HC, 3rd, Trainin Z, Toder V,  
375 Chervonsky AV, Golovkina TV. 2002. Characterization of a novel murine retrovirus  
376 mixture that facilitates hematopoiesis. *J Virol* 76:12112-22.
- 377 4. Davis BR, Brightman BK, Chandy KG, Fan H. 1987. Characterization of a preleukemic  
378 state induced by Moloney murine leukemia virus: evidence for two infection events  
379 during leukemogenesis. *Proc Natl Acad Sci U S A* 84:4875-9.
- 380 5. Brightman BK, Davis BR, Fan H. 1990. Preleukemic hematopoietic hyperplasia induced  
381 by Moloney murine leukemia virus is an indirect consequence of viral infection. *J Virol*  
382 64:4582-4.
- 383 6. Sitbon M, Evans L, Nishio J, Wehrly K, Chesebro B. 1986. Analysis of two strains of  
384 Friend murine leukemia viruses differing in ability to induce early splenomegaly: lack of  
385 relationship with generation of recombinant mink cell focus-forming viruses. *J Virol*  
386 57:389-93.
- 387 7. Purdy A, Case L, Duvall M, Overstrom-Coleman M, Monnier N, Chervonsky A,  
388 Golovkina T. 2003. Unique resistance of I/LnJ mice to a retrovirus is due to sustained  
389 interferon gamma-dependent production of virus-neutralizing antibodies. *J Exp Med*  
390 197:233-43.
- 391 8. Chesebro B, Miyazawa M, Britt WJ. 1990. Host genetic control of spontaneous and  
392 induced immunity to Friend murine retrovirus infection. *Annu Rev Immunol* 8:477-99.
- 393 9. Dittmer U, He H, Messer RJ, Schimmer S, Olbrich AR, Ohlen C, Greenberg PD,  
394 Stromnes IM, Iwashiro M, Sakaguchi S, Evans LH, Peterson KE, Yang G, Hasenkrug KJ.  
395 2004. Functional impairment of CD8(+) T cells by regulatory T cells during persistent  
396 retroviral infection. *Immunity* 20:293-303.
- 397 10. Evans DT, Desrosiers RC. 2001. Immune evasion strategies of the primate lentiviruses.  
398 *Immunol Rev* 183:141-58.
- 399 11. Jude BA, Pobezinskaya Y, Bishop J, Parke S, Medzhitov RM, Chervonsky AV,  
400 Golovkina TV. 2003. Subversion of the innate immune system by a retrovirus. *Nat*  
401 *Immunol* 4:573-8.
- 402 12. Kane M, Case LK, Kopaskie K, Kozlova A, MacDermid C, Chervonsky AV, Golovkina  
403 TV. 2011. Successful transmission of a retrovirus depends on the commensal microbiota.  
404 *Science* 334:245-9.
- 405 13. Malim MH, Bieniasz PD. 2012. HIV Restriction Factors and Mechanisms of Evasion.  
406 *Cold Spring Harb Perspect Med* 2:a006940.
- 407 14. Kane M, Case LK, Golovkina TV. 2011. Vital role for CD8+ cells in controlling  
408 retroviral infections. *J Virol* 85:3415-23.
- 409 15. Kane M, Case LK, Wang C, Yurkovetskiy L, Dikiy S, Golovkina TV. 2011. Innate  
410 immune sensing of retroviral infection via Toll-like receptor 7 occurs upon viral entry.  
411 *Immunity* 35:135-45.
- 412 16. Kane M, Golovkina TV. 2019. Mapping Viral Susceptibility Loci in Mice. *Annu Rev*  
413 *Virol* 6:525-546.

- 414 17. Bassin RH, Duran-Troise G, Gerwin BI, Rein A. 1978. Abrogation of Fv-1b restriction  
415 with murine leukemia viruses inactivated by heat or by gamma irradiation. *J Virol*  
416 26:306-15.
- 417 18. Best S, Le Tissier P, Towers G, Stoye JP. 1996. Positional cloning of the mouse  
418 retrovirus restriction gene Fv1. *Nature* 382:826-9.
- 419 19. Boone LR, Innes CL, Heitman CK. 1990. Abrogation of Fv-1 restriction by genome-  
420 deficient virions produced by a retrovirus packaging cell line. *J Virol* 64:3376-81.
- 421 20. DesGroseillers L, Jolicoeur P. 1983. Physical mapping of the Fv-1 tropism host range  
422 determinant of BALB/c murine leukemia viruses. *J Virol* 48:685-96.
- 423 21. Halemano K, Barrett BS, Li SX, Harper MS, Smith DS, Heilman KJ, Santiago ML. 2013.  
424 Fv1 restriction and retrovirus vaccine immunity in Apobec3-deficient 129P2 mice. *PLoS*  
425 *One* 8:e60500.
- 426 22. Miyazawa M, Tsuji-Kawahara S, Kanari Y. 2008. Host genetic factors that control  
427 immune responses to retrovirus infections. *Vaccine* 26:2981-96.
- 428 23. Persons DA, Paulson RF, Loyd MR, Herley MT, Bodner SM, Bernstein A, Correll PH,  
429 Ney PA. 1999. Fv2 encodes a truncated form of the Stk receptor tyrosine kinase. *Nat*  
430 *Genet* 23:159-65.
- 431 24. Takeda E, Tsuji-Kawahara S, Sakamoto M, Langlois MA, Neuberger MS, Rada C,  
432 Miyazawa M. 2008. Mouse APOBEC3 restricts friend leukemia virus infection and  
433 pathogenesis in vivo. *J Virol* 82:10998-1008.
- 434 25. Denzin LK, Khan AA, Viridis F, Wilks J, Kane M, Beilinson HA, Dikiy S, Case LK,  
435 Roopenian D, Witkowski M, Chervonsky AV, Golovkina TV. 2017. Neutralizing  
436 Antibody Responses to Viral Infections Are Linked to the Non-classical MHC Class II  
437 Gene H2-Ob. *Immunity* 47:310-322 e7.
- 438 26. Case LK, Petell L, Yurkovetskiy L, Purdy A, Savage KJ, Golovkina TV. 2008.  
439 Replication of beta- and gammaretroviruses is restricted in I/LnJ mice via the same  
440 genetic mechanism. *Journal of virology* 82:1438-47.
- 441 27. Perlmutter RM, Hansburg D, Briles DE, Nicolotti RA, Davie JM. 1978. Subclass  
442 restriction of murine anti-carbohydrate antibodies. *J Immunol* 121:566-72.
- 443 28. Rosenberg YJ, Chiller JM. 1979. Ability of antigen-specific helper cells to effect a class-  
444 restricted increase in total Ig-secreting cells in spleens after immunization with the  
445 antigen. *J Exp Med* 150:517-30.
- 446 29. Coutelier JP, van der Logt JT, Heessen FW, Warnier G, Van Snick J. 1987. IgG2a  
447 restriction of murine antibodies elicited by viral infections. *J Exp Med* 165:64-9.
- 448 30. Nguyen TD, Bigaignon G, Van Broeck J, Vercammen M, Nguyen TN, Delmee M,  
449 Turneer M, Wolf SF, Coutelier JP. 1998. Acute and chronic phases of *Toxoplasma gondii*  
450 infection in mice modulate the host immune responses. *Infect Immun* 66:2991-5.
- 451 31. Spinella S, Liegeard P, Hontebeyrie-Joskowicz M. 1992. *Trypanosoma cruzi*:  
452 predominance of IgG2a in nonspecific humoral response during experimental Chagas'  
453 disease. *Exp Parasitol* 74:46-56.
- 454 32. Finkelman FD, Katona IM, Mosmann TR, Coffman RL. 1988. IFN-gamma regulates the  
455 isotypes of Ig secreted during in vivo humoral immune responses. *J Immunol* 140:1022-  
456 7.
- 457 33. Stromnes IM, Dittmer U, Schumacher TN, Schepers K, Messer RJ, Evans LH, Peterson  
458 KE, Race B, Hasenkrug KJ. 2002. Temporal effects of gamma interferon deficiency on  
459 the course of Friend retrovirus infection in mice. *J Virol* 76:2225-32.
- 460 34. Kane M, Deiss F, Chervonsky A, Golovkina TV. 2018. A Single Locus Controls  
461 Interferon Gamma-Independent Antiretroviral Neutralizing Antibody Responses. *J Virol*  
462 92.

- 463 35. Simpson EM, Linder CC, Sargent EE, Davisson MT, Mobraaten LE, Sharp JJ. 1997.  
464 Genetic variation among 129 substrains and its importance for targeted mutagenesis in  
465 mice. *Nat Genet* 16:19-27.
- 466 36. Threadgill DW, Yee D, Matin A, Nadeau JH, Magnuson T. 1997. Genealogy of the 129  
467 inbred strains: 129/SvJ is a contaminated inbred strain. *Mamm Genome* 8:390-3.
- 468 37. Jung YT, Kozak CA. 2000. A single amino acid change in the murine leukemia virus  
469 capsid gene responsible for the Fv1(nr) phenotype. *J Virol* 74:5385-7.
- 470 38. Stevens A, Bock M, Ellis S, LeTissier P, Bishop KN, Yap MW, Taylor W, Stoye JP.  
471 2004. Retroviral capsid determinants of Fv1 NB and NR tropism. *J Virol* 78:9592-8.
- 472 39. Santiago ML, Montano M, Benitez RL, Messer RJ, Yonemoto W, Chesebro B,  
473 Hasenkrug KJ, Greene WC. 2008. Apobec3 Encodes Rfv3, a Gene Influencing  
474 Neutralizing Antibody Control of Retrovirus Infection. *Science* 321:1343-1346.
- 475 40. Anonymous. 129S1/SvImJ- Development. <https://www.jax.org/strain/002448>. Accessed  
476 41. van den Broek MF, Müller U, Huang S, Aguet M, Zinkernagel RM. 1995. Antiviral  
477 defense in mice lacking both alpha/beta and gamma interferon receptors. *Journal of*  
478 *virology* 69:4792-4796.
- 479 42. Markine-Goriaynoff D, van der Logt JT, Truyens C, Nguyen TD, Heessen FW,  
480 Bigaignon G, Carlier Y, Coutelier JP. 2000. IFN-gamma-independent IgG2a production  
481 in mice infected with viruses and parasites. *International immunology* 12:223-230.
- 482 43. Liu C, Chikina M, Deshpande R, Menk AV, Wang T, Tabib T, Brunazzi EA, Vignali  
483 KM, Sun M, Stolz DB, Lafyatis RA, Chen W, Delgoffe GM, Workman CJ, Wendell SG,  
484 Vignali DAA. 2019. Treg Cells Promote the SREBP1-Dependent Metabolic Fitness of  
485 Tumor-Promoting Macrophages via Repression of CD8(+) T Cell-Derived Interferon-  
486 gamma. *Immunity* 51:381-397 e6.
- 487 44. Festing MF, Simpson EM, Davisson MT, Mobraaten LE. 1999. Revised nomenclature for  
488 strain 129 mice. *Mamm Genome* 10:836.
- 489 45. Cantin E, Tanamachi B, Openshaw H, Mann J, Clarke K. 1999. Gamma interferon (IFN-  
490 gamma) receptor null-mutant mice are more susceptible to herpes simplex virus type 1  
491 infection than IFN-gamma ligand null-mutant mice. *J Virol* 73:5196-200.
- 492 46. Espejo C, Penkowa M, Saez-Torres I, Xaus J, Celada A, Montalban X, Martinez-Caceres  
493 EM. 2001. Treatment with anti-interferon-gamma monoclonal antibodies modifies  
494 experimental autoimmune encephalomyelitis in interferon-gamma receptor knockout  
495 mice. *Exp Neurol* 172:460-8.
- 496 47. Lee EY, Schultz KL, Griffin DE. 2013. Mice deficient in interferon-gamma or interferon-  
497 gamma receptor 1 have distinct inflammatory responses to acute viral encephalomyelitis.  
498 *PLoS One* 8:e76412.
- 499 48. Huang S, Hendriks W, Althage A, Hemmi S, Bluethmann H, Kamijo R, Vilcek J,  
500 Zinkernagel RM, Aguet M. 1993. Immune response in mice that lack the interferon-  
501 gamma receptor. *Science* 259:1742-5.
- 502 49. Bae S, Park J, Kim JS. 2014. Cas-OFFinder: a fast and versatile algorithm that searches  
503 for potential off-target sites of Cas9 RNA-guided endonucleases. *Bioinformatics*  
504 30:1473-5.
- 505 50. Ealick SE, Cook WJ, Vijay-Kumar S, Carson M, Nagabhushan TL, Trotta PP, Bugg CE.  
506 1991. Three-dimensional structure of recombinant human interferon-gamma. *Science*  
507 252:698-702.

508  
509

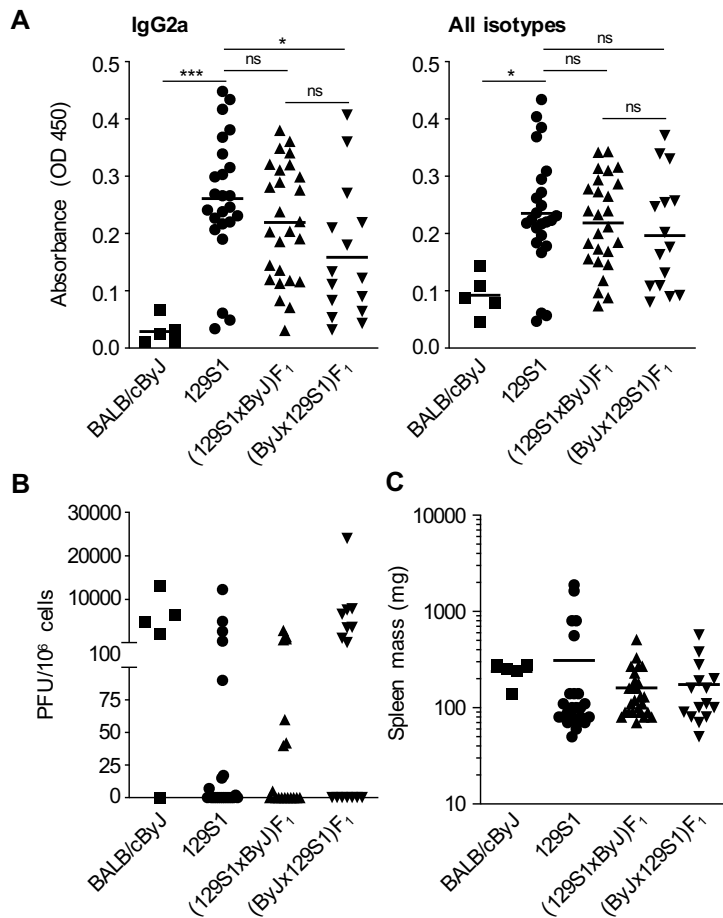

510

511 **Figure 1. Anti MLV-Ab production in 129S1 mice is controlled by a dominant genetic**  
512 **mechanism.**

513 **A)** BALB/cByJ, 129S1, or F<sub>1</sub> mice were infected with RL-MLV and monitored for IgG2a-  
514 specific antibodies (left) or total Igs (right) against RL-MLV virion proteins by ELISA 8-10  
515 weeks post infection. ns, not significant; \*, p<0.05; \*\*\*, p<0.001

516 **B)** Spleen cells from RL-MLV infected mice were subjected to an infectious center assay 8-  
517 10 weeks post infection.

518 **C)** Spleen weights of RL-MLV infected mice at 8-10 weeks post infection.

519

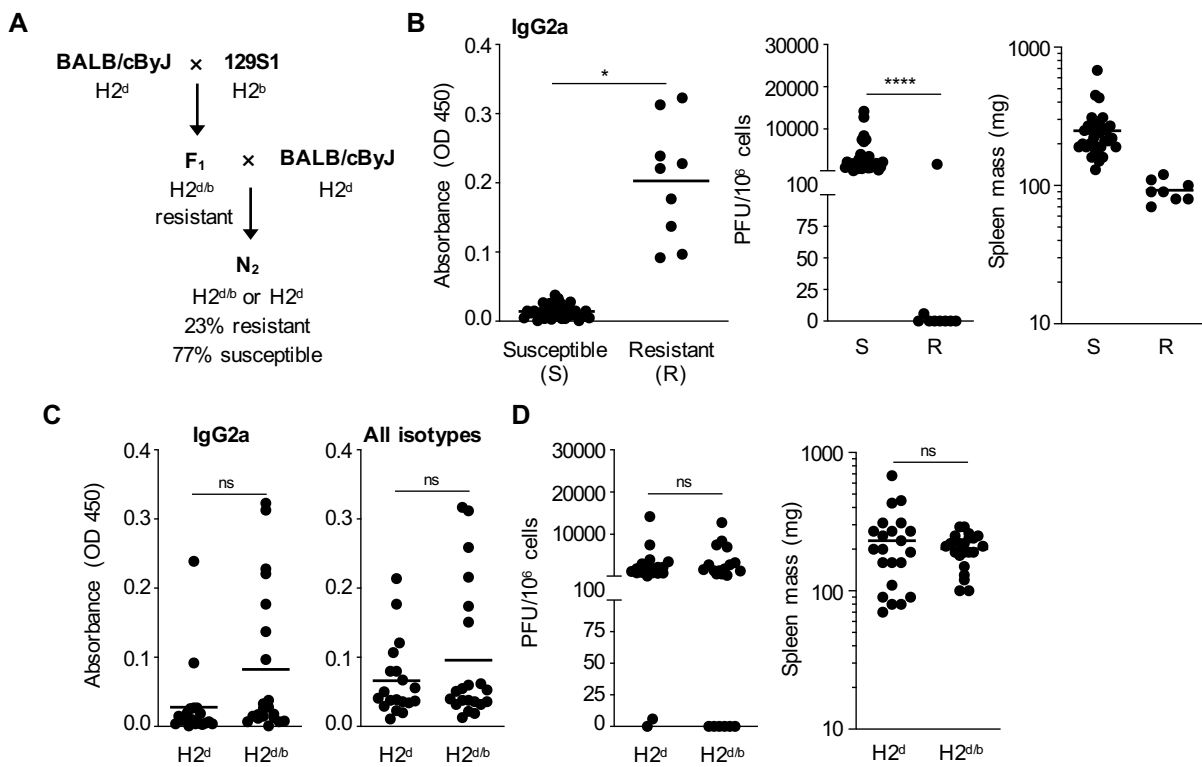

520

521 **Figure 2. Anti MLV-Ab production in 129S1 mice is controlled by two non-MHC loci.**

522 **A)** Diagram of breeding scheme used to determine Mendelian inheritance of the  
 523 mechanism controlling IFN $\gamma$ -independent IgG2a Ab production. F<sub>1</sub> and N<sub>2</sub> crosses were  
 524 conducted in both directions, with just one direction shown here for simplicity.

525 **B)** N<sub>2</sub> mice generated from crossing (129S1xByJ)F<sub>1</sub> and ByJ mice as shown in A) were  
 526 infected with RL-MLV. Eight weeks post infection, their sera were tested for IgG2a Abs  
 527 against MLV virion proteins by ELISA (left), mice were classified as “resistant” if their  
 528 sera reacted with MLV virion proteins with an absorbance greater than 0.1 at OD 450  
 529 with an IgG2a-specific secondary. Susceptible and resistant mice were then tested for  
 530 presence of infectious virions in their spleens by XC plaque assay (center), and spleen  
 531 weights were measured (right).

532 **C)** MHC haplotypes of N<sub>2</sub> mice from B) were determined by FACS analysis and then levels  
 533 of IgG2a-specific antibodies (left) or total Igs (right) reactive against RL-MLV virion  
 534 proteins by ELISA were compared.

535        **D)** Presence of infectious virions in spleen (left) and spleen weights (right) of N<sub>2</sub> mice  
536                grouped by MHC haplotype.  
537

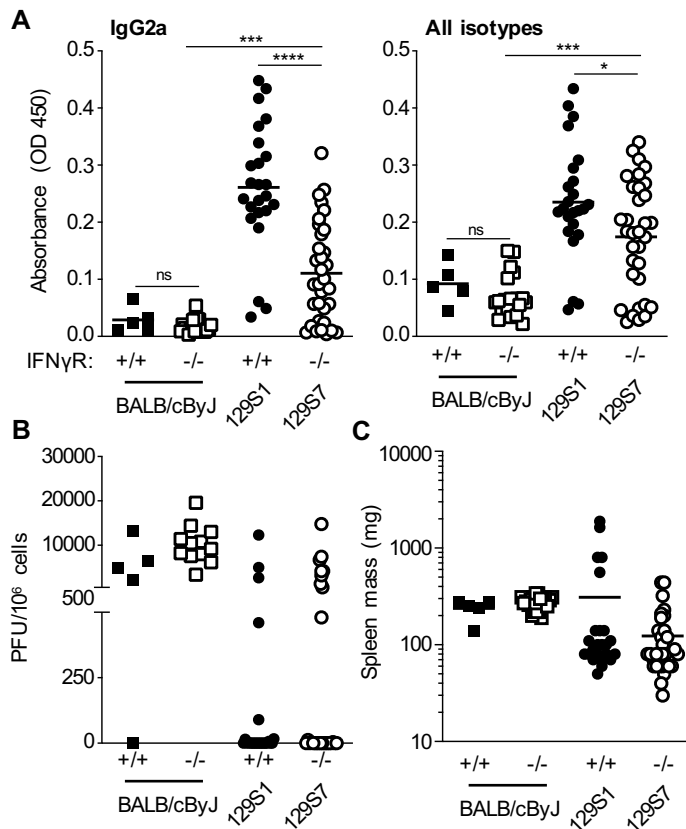

538

539 **Figure 3. IFN $\gamma$ R-independent anti-MLV IgG2a Ab production in 129S7 mice**

540 **A)** Mice of the indicated genotypes were infected with RL-MLV and monitored for IgG2a-  
541 specific antibodies (left) or total Igs (right) against RL-MLV virion proteins by ELISA 8-10  
542 weeks post infection. ns, not significant; \*,  $p < 0.05$ ; \*\*\*,  $p < 0.001$ ; \*\*\*\*,  $p < 0.0001$

543 **B)** Spleen cells from RL-MLV infected mice were subjected to an infectious center assay 8-  
544 10 weeks post infection.

545 **C)** Spleen weights of RL-MLV infected mice at 8-10 weeks post infection.

546

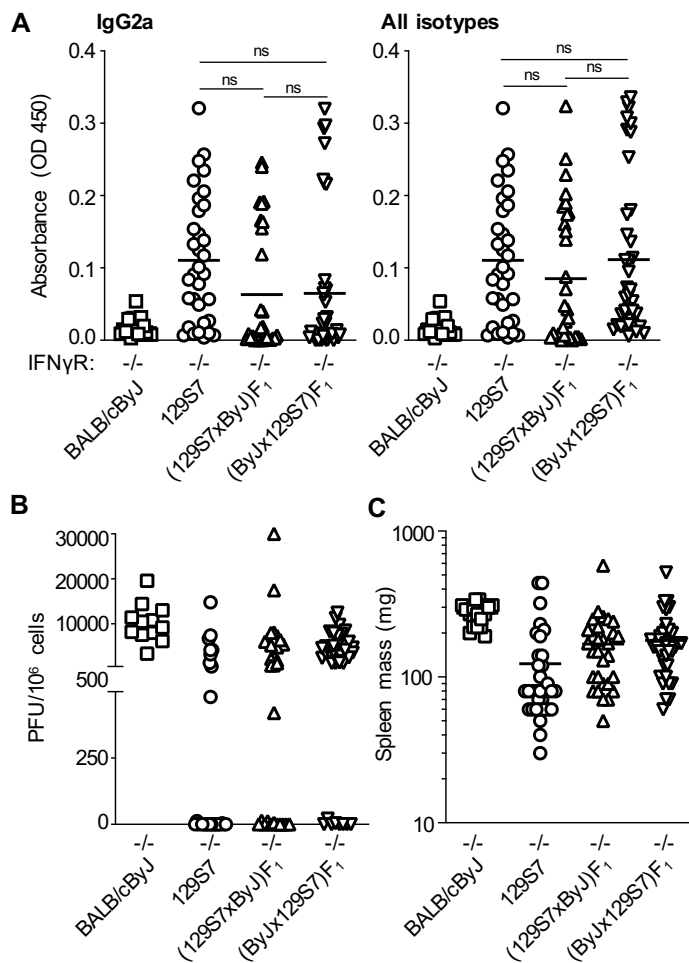

547

548 **Figure 4. IFN $\gamma$ R-independent anti-MLV Ab production in 129S7 mice is a complex trait**

549 **A)** IFN $\gamma$ R<sup>-/-</sup> BALB/cByJ, 129S7, and F<sub>1</sub> mice of the indicated genotypes were infected with  
550 RL-MLV and monitored for IgG2a-specific antibodies (left) or total Igs (right) against RL-  
551 MLV virion proteins by ELISA eight weeks post infection. ns, not significant

552 **B)** Spleen cells from RL-MLV infected mice were subjected to an infectious center assay  
553 eight weeks post infection.

554 **C)** Spleen weights of RL-MLV infected mice at eight weeks post infection.

555



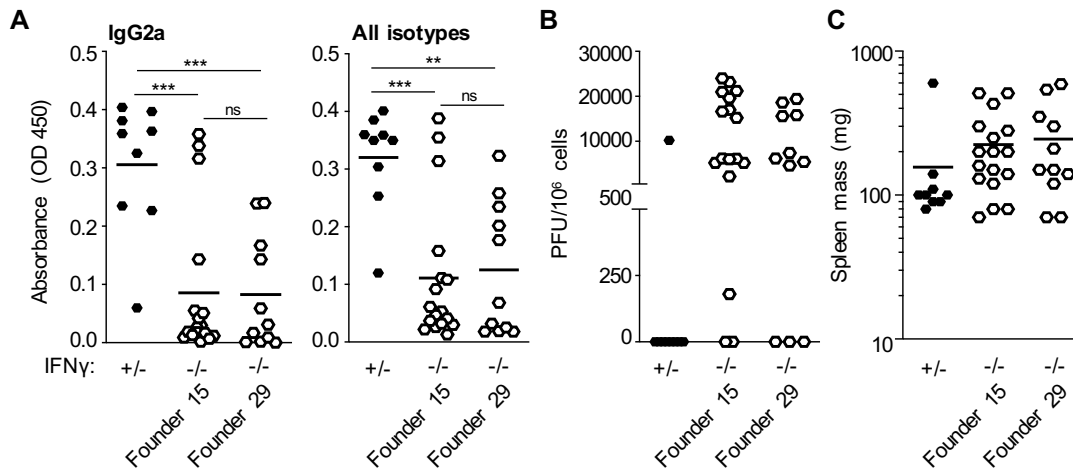

556

557 **Figure 5. Anti-MLV Ab responses in 129S1 mice are IFN $\gamma$ -dependent**

558 **A)** IFN $\gamma$ -deficient and heterozygous control mice from two 129S1 founder lines were  
559 infected with RL-MLV and monitored for IgG2a-specific antibodies (left) or total Igs  
560 (right) against RL-MLV virion proteins by ELISA eight weeks post infection. ns, not  
561 significant; \*\*,  $p < 0.01$ ; \*\*\*,  $p < 0.001$

562 **B)** Spleen cells from RL-MLV infected mice were subjected to an infectious center assay  
563 eight weeks post infection.

564 **C)** Spleen weights of RL-MLV infected mice at eight weeks post infection.

565

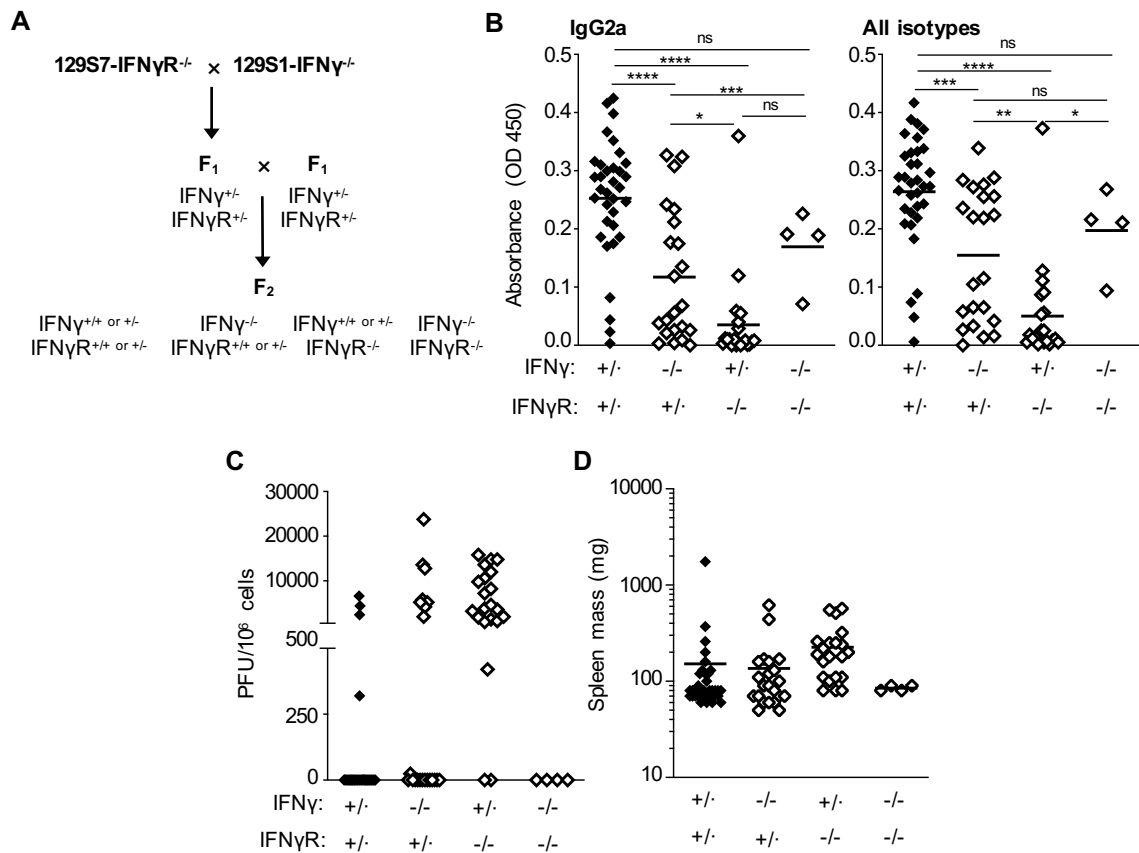

566

567 **Figure 6. Genetic differences between 129S substrains affect IFN $\gamma$ -independent anti-**  
 568 **MLV Ab responses**

569 **A)** Diagram of breeding scheme used to generate IFN $\gamma$ , IFN $\gamma$ R, and IFN $\gamma$ /IFN $\gamma$ R-deficient  
 570 mice of mixed 129S7 and 129S1 genetic background.

571 **B)** F<sub>2</sub> mice of the indicated genotypes generated from intercrossing (129S7-*Ifng*<sup>-/-</sup> ×  
 572 129S1-*Ifng*<sup>-/-</sup>)F<sub>1</sub> mice as shown in A) were infected with RL-MLV. 8-10 weeks post  
 573 infection, their sera were tested for IgG2a-specific antibodies (left) or total Igs (right)  
 574 against RL-MLV virion proteins by ELISA. +/-, either heterozygous or homozygous wild  
 575 type. ns, not significant; \*, p<0.05; \*\*, p<0.01; \*\*\*, p<0.001; \*\*\*\*, p<0.0001

576 **C)** Spleen cells from RL-MLV infected F<sub>2</sub> mice were subjected to an infectious center assay  
 577 eight weeks post infection.

578 **D)** Spleen weights of RL-MLV infected F<sub>2</sub> mice at eight weeks post infection.

579

**Table 1.** Genotypes of inbred strains at MLV-resistance loci

| Genotype*                            |           |              |            |             |             |             |                     |
|--------------------------------------|-----------|--------------|------------|-------------|-------------|-------------|---------------------|
| Strain                               | <i>H2</i> | <i>Fv1</i>   | <i>Fv2</i> | <i>Rfv3</i> | <i>vic1</i> | <i>igii</i> | References          |
| BALB/cJ                              | <i>d</i>  | <i>b/b</i>   | <i>s/s</i> | <i>s/s</i>  | <i>s/s</i>  | <i>r/r</i>  | (24-26, 34, 39)     |
| BALB/cByJ                            | <i>d</i>  | <i>b/b</i>   | <i>s/s</i> | <i>s/s</i>  | <i>s/s</i>  | **          | (24-26, 39)         |
| BALB/cJ <sup><i>vic1</i> I/LnJ</sup> | <i>j</i>  | <i>b/b</i>   | <i>s/s</i> | <i>s/s</i>  | <i>s/s</i>  | <i>r/r</i>  | (24-26, 34, 39)     |
| I/LnJ                                | <i>j</i>  |              |            | <i>s/s</i>  | <i>r/r</i>  | <i>s/s</i>  | (25, 26, 34)        |
| 129S1/SvImJ                          | <i>b</i>  | <i>nr/nr</i> | <i>s/s</i> | <i>s/s</i>  | <i>s/s</i>  | <i>s/s</i>  | (21, 25) This study |
| 129S7/SvEvBrd-Hprt <sup>+</sup>      | <i>b</i>  | <i>nr/nr</i> | <i>s/s</i> | <i>s/s</i>  | <i>s/s</i>  | **          | (21, 25) This study |
| C57BL/                               | <i>b</i>  | <i>b/b</i>   | <i>r/r</i> | <i>r/r</i>  | <i>s/s</i>  | <i>s/s</i>  | (24, 39)            |

s = Susceptible, r = Resistant, Blank cells = not tested or unknown

\*- *H2* haplotype (MHC locus) affects T cell and NK cell responses; *Fv1* controls capsid-dependent tropism; *Fv2* is a dominant FV susceptibility gene that facilitates splenomegaly and erythroleukemia induction by SFFV; *Rfv3* is a dominant FV resistance gene that promotes neutralizing Ab responses; *vic1* is a recessive retroviral resistance gene that promotes neutralizing Ab responses; *igii* is a recessive locus linked to production of anti-viral IgG2a Abs in the absence of IFN $\gamma$ .

\*\*- Although BALB/cByJ mice likely inherit the resistant allele of *igii*, and the findings reported here suggest that 129S7 mice inherit a susceptible allele, these genotypes have not yet been definitively determined.

580  
581  
582  
583  
584  
585  
586  
587  
588  
589  
590

## Supplemental Materials and Methods

### Splenocyte isolation for stimulation

The spleens of mice were aseptically isolated, trimmed of all excess tissue and placed in sterile phosphate-buffered saline (PBS, Corning). Cell suspensions were erythrocyte-depleted by incubation in 450 $\mu$ l sterile distilled water (Gibco) for 10 seconds before the addition of 50 $\mu$ l of 10X PBS (Gibco) and 4mL of 1X PBS. Cell suspensions were pelleted at 300xg for 5 min at 25°C. Splenocytes were resuspended in RPMI 1640 Medium (Gibco), supplemented with 10% heat-inactivated fetal calf serum (FCS, Gibco) and 50 $\mu$ g/ml gentamicin (Gibco).

### Flow cytometry

Splenocytes ( $2 \times 10^6$ ) were stimulated with 50ng/ml phorbol 12-myristate 13-acetate (PMA, Sigma-Aldrich) and 750ng/ml ionomycin (Sigma-Aldrich) at 37°C with 5% CO<sub>2</sub> for six hours. For the last five hours, 1 $\mu$ g/ml GolgiPlug™ Protein Transport Inhibitor (BD Biosciences) was added to block cytokine secretion. Cells were surface stained with antibodies against AlexaFlour 532-conjugated CD45 (clone 30-F11, Invitrogen) in PBS supplemented with 0.5% BSA, 0.1% sodium azide, 3mM egtazic acid (EGTA), and 20 $\mu$ g/mL DNase1. Cells were then fixed and permeabilized with eBioscience™ Foxp3/Transcription Factor Staining Buffer Set (Invitrogen) and stained intracellularly with phycoerythrin (PE)-conjugated anti-IFN $\gamma$  (clone XMG1.2 RUO, BD Bioscience) in permeabilization buffer. Cells were stained for viability with Zombie NIR™ Fixable Viability Kit (BioLegend) in PBS and Mouse Fc Block™ (BD Biosciences). Samples were analyzed on a Cytex® Aurora (Cytex Biosciences).

### IFN $\gamma$ detection assay

IFN $\gamma$  detection assay for biologically active mouse IFN $\gamma$  was performed using B16-Blue™ IFN $\gamma$  reporter cells (InvivoGen) engineered to produce secreted alkaline phosphatase (SEAP) in response to IFN $\gamma$  stimulation. Cells were cultured following the manufacturer's protocol in Dulbecco's Modified Eagles Medium (DMEM, Gibco) supplemented with 10% FCS, 50 $\mu$ g/ml gentamicin, 100  $\mu$ g/ml Normocin™ (InvivoGen), and 100  $\mu$ g/ml Zeocin® (InvivoGen).

Splenocytes ( $2 \times 10^6$ ) were stimulated with 50ng/ml PMA and 750ng/ml ionomycin in 200 $\mu$ l of cell culture medium at 37°C/5% CO<sub>2</sub> for 16 hours. After stimulation, 20 $\mu$ l of supernatant were added per well in a 96-well flat bottom plate. To generate a standard curve, 20 $\mu$ l recombinant murine IFN $\gamma$  (MilliporeSigma™ 40732020UG) was added at a starting concentration of 100ng/ml and serially diluted (five-fold dilutions). After addition of samples,  $7.2 \times 10^4$  B16-Blue™ IFN $\gamma$  cells were added in 180 $\mu$ l of cell culture medium for a final working volume of 200 $\mu$ l. Samples were incubated at 37°C/5% CO<sub>2</sub> for 24 hours.

For QUANTI-Blue detection of SEAP, 20 $\mu$ l of supernatant was added to a 96-well flat bottom plate followed by addition of 180 $\mu$ l of QUANTI-Blue Solution™ (InvivoGen) and incubated at 37°C for 24 hours. SEAP levels were determined using a Synergy H1 microplate reader (BioTek) by reading the optical density (OD) at 650nm. Background was subtracted with a negative control of QUANTI-Blue Solution™ incubated with 20 $\mu$ l of complete cell culture media. Levels of IFN $\gamma$  in splenocyte supernatants were determined based on a standard curve for recombinant murine IFN $\gamma$ .

### **Immunoblot Analysis**

RL-MLV virions were isolated from supernatants of infected SC-1 cells via centrifugation at 95,000xg. MLV virions were lysed in NuPage LDS sample buffer (Novex), separated by electrophoresis on NuPage 4–12% Bis-Tris gels (Invitrogen) and blotted onto polyvinylidene fluoride (PDVF, BioRad Laboratories). Membranes were incubated with sera at  $5 \times 10^{-3}$  dilution. For the second step, membranes were incubated with goat anti-mouse-IgG2a-specific antibodies coupled to HRP (Jackson ImmunoResearch). Blots were developed with SuperSignal™ West Pico PLUS Chemiluminescent Substrate (Thermo Scientific) and imaged on the ChemiDoc Imaging System (Bio-Rad).

**Table S1.** Summary of mice utilized in this investigation and their phenotype upon MLV infection

| Mice                                              | Genotype     |                | MLV infections |                                        |           |
|---------------------------------------------------|--------------|----------------|----------------|----------------------------------------|-----------|
|                                                   | IFN $\gamma$ | IFN $\gamma$ R | # Infected     | # with $\leq 100$ PFU/<br>$10^6$ cells | % Cleared |
| BALB/cByJ                                         | +/+          | +/+            | 5              | 1                                      | 20%       |
| BALB/cByJ                                         | +/+          | -/-            | 12             | 0                                      | 0%        |
| 129S1/SvImJ (129S1)                               | +/+          | +/+            | 24             | 20                                     | 83%       |
| 129S1                                             | +/-          | +/+            | 9              | 8                                      | 89%       |
| 129S1                                             | -/-          | +/+            | 28             | 5                                      | 18%       |
| (129S1xByJ)F <sub>1</sub>                         | +/+          | +/+            | 18             | 14                                     | 78%       |
| (ByJx129S1)F <sub>1</sub>                         | +/+          | +/+            | 15             | 7                                      | 47%       |
| ([129S1xByJ]xByJ)N <sub>2</sub> resistant         | +/+          | +/+            | 9              | 8                                      | 89%       |
| ([129S1xByJ]xByJ)N <sub>2</sub> susceptible       | +/+          | +/+            | 31             | 0                                      | 0%        |
| ([129S1xByJ]xByJ)N <sub>2</sub> H2 <sup>d</sup>   | +/+          | +/+            | 2              | 19                                     | 11%       |
| ([129S1xByJ]xByJ)N <sub>2</sub> H2 <sup>d/b</sup> | +/+          | +/+            | 6              | 21                                     | 29%       |
| 129S7                                             | +/+          | -/-            | 20             | 12                                     | 60%       |
| (129S7xByJ)F <sub>1</sub>                         | +/+          | -/-            | 30             | 11                                     | 37%       |
| (ByJx129S7)F <sub>1</sub>                         | +/+          | -/-            | 38             | 8                                      | 21%       |
| (129S7x129S1)F <sub>2</sub>                       | +/-          | +/-            | 34             | 30                                     | 88%       |
| (129S7x129S1)F <sub>2</sub>                       | -/-          | +/-            | 22             | 14                                     | 64%       |
| (129S7x129S1)F <sub>2</sub>                       | +/-          | -/-            | 21             | 2                                      | 10%       |
| (129S7x129S1)F <sub>2</sub>                       | -/-          | -/-            | 4              | 4                                      | 100%      |

+/- - either heterozygous wild-type/knock-out or homozygous wild-type

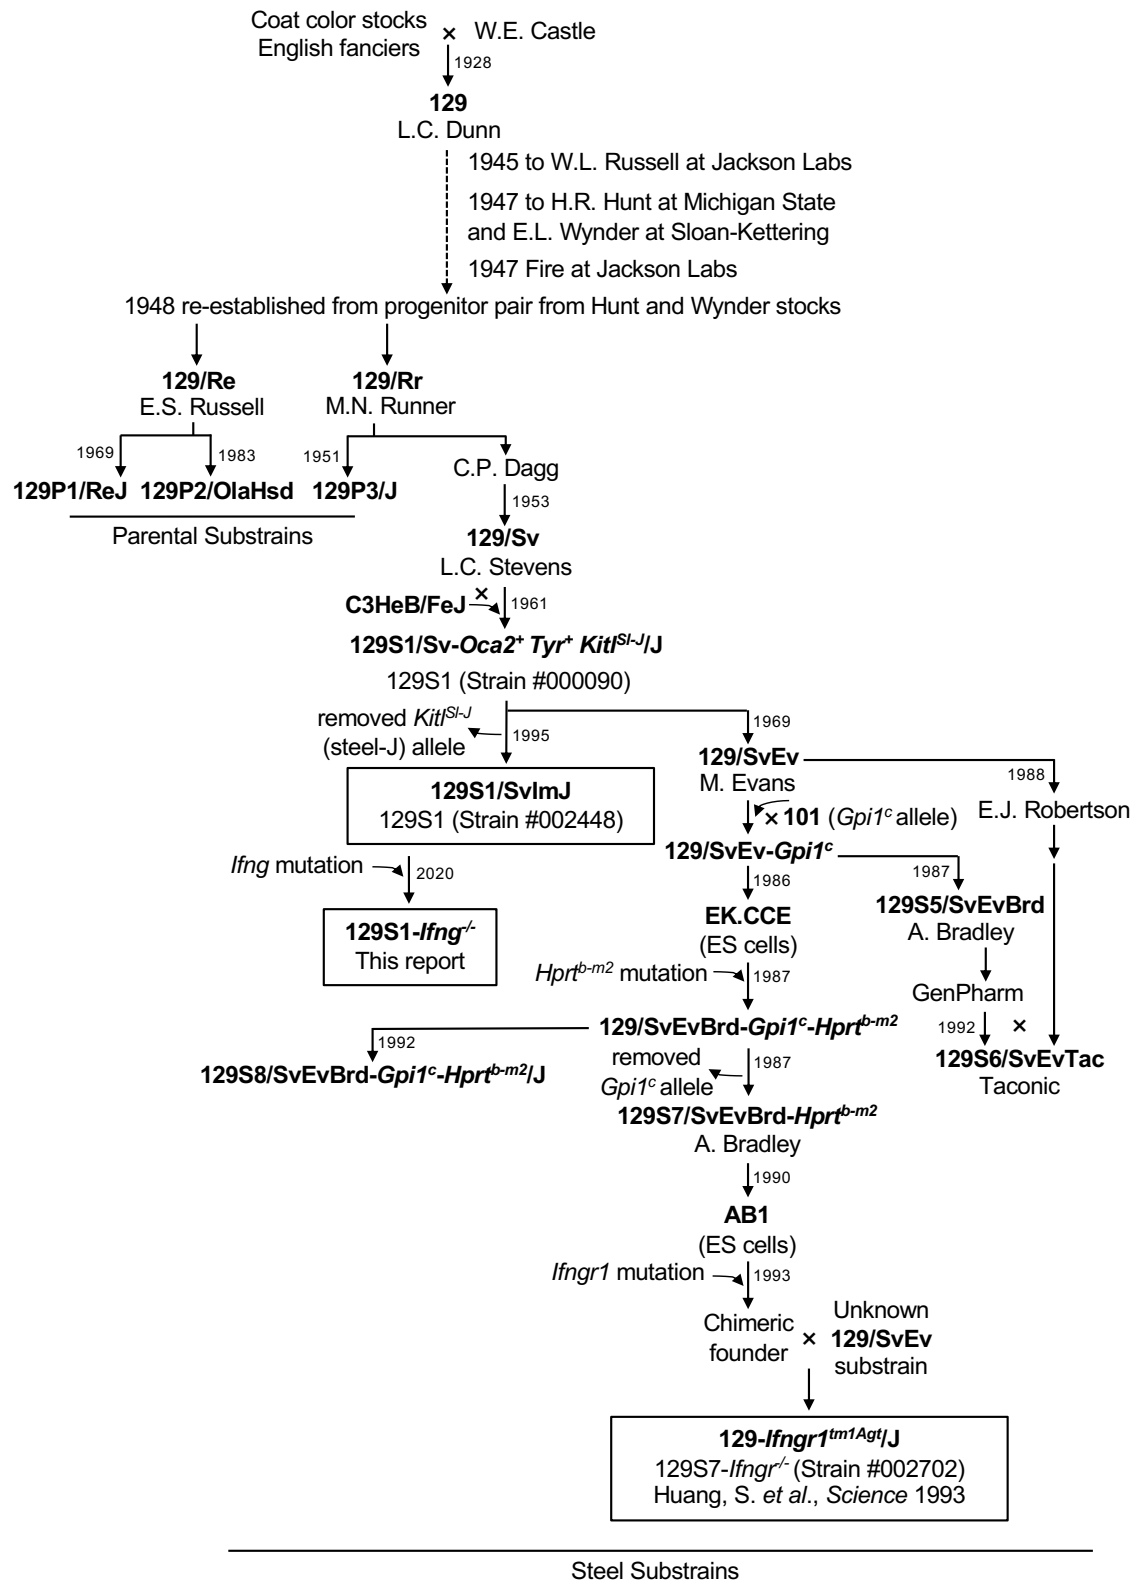

**Figure S1. History of selected 129 sublines.** Schematic of the genealogy of 129S1 and 129S7-*Ifngr1*<sup>-/-</sup> mice. Adapted from (35).

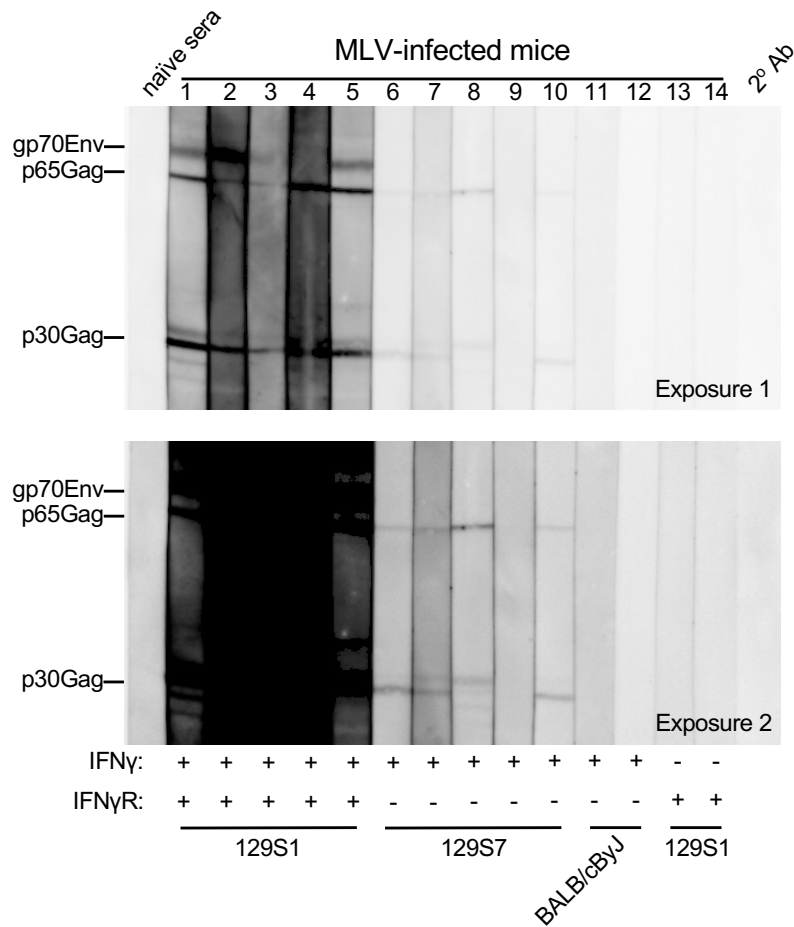

**Figure S2. Specificity of antiviral Abs.** Sera from 129S and BALB/cByJ mice of the indicated genotypes were tested for reactivity against MLV virion proteins by immunoblot 10 weeks post infection. Goat anti-mouse IgG2a-specific Abs coupled to HRP were used at the second step. Numbers correspond to individual mice. Two different exposures are shown.



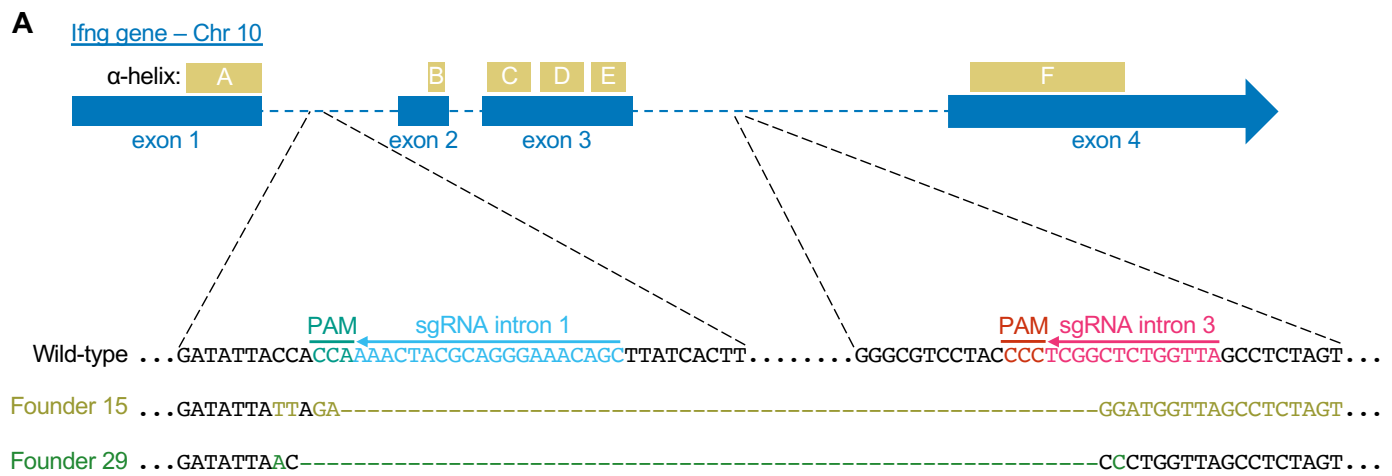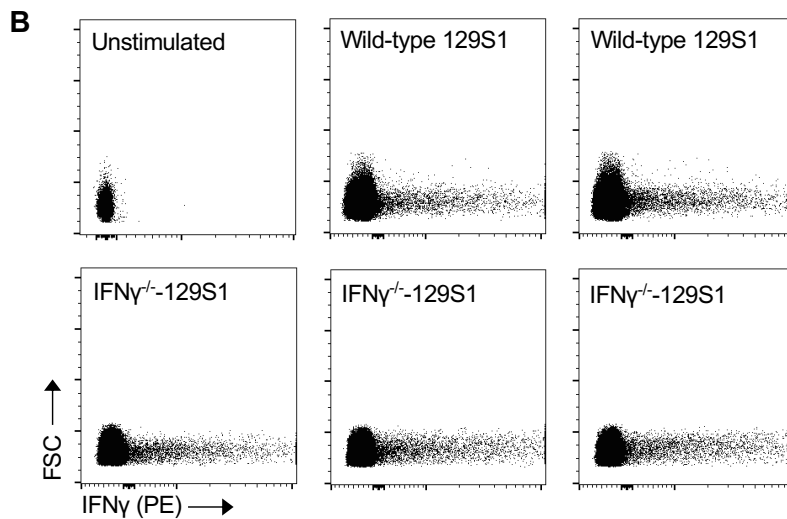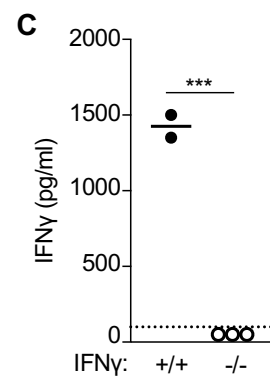

**Figure S3. Generation of IFN $\gamma$ -deficient 129S1 mice. A)** Diagram of the *Ifng* locus, with sgRNA targeting sited in introns 1 and 3 indicated. The six  $\alpha$ -helices based on the human IFN $\gamma$  structure (REF) are indicated above the exons. Sequence of wild-type mice at targeted sites, with sgRNA and PAM sites indicated. Dots indicate sequences flanking those shown in detail. Sequences of the locus in selected founder mice with mismatches to wild-type sequence highlighted and deleted sequence indicated by dashes. Both founder lines lack exons 2 and 3, which encode for amino acids 38-120 (helices B through E). **B)** Truncated IFN $\gamma$  is expressed in IFN $\gamma$ <sup>-/-</sup>-129S1 mice. Flow-cytometric plots showing intracellular IFN $\gamma$  in unstimulated and PMA/ionomycin-stimulated CD45<sup>+</sup> splenocytes from wild-type 129S1 and IFN $\gamma$ <sup>-/-</sup>-129S1 (Founder 29) mice. **C)** The truncated IFN $\gamma$  expressed in 129S1-*Ifng*<sup>-/-</sup> mice is not biologically active. Detection of IFN $\gamma$  in supernatants from PMA/ionomycin-stimulated splenocytes from wild-type 129S1 and IFN $\gamma$ <sup>-/-</sup>-129S1 (Founder 29) mice by B16-Blue™ IFN $\gamma$  cells. Dashed line indicates the limit of detection (100pg/ml).
